# Supplementary material for: Jagged and Delta-like ligands control distinct events during airway progenitor cell differentiation
Source: eLife journal article supplement (doi:10.7554/elife.50487), 2019-10-21
Supplement: supp [file elife_poa_e50487_Figure_2_source_data_1.xlsx]

## Sheet: E18.5 Jag1cnull (Foxj1)
sample	target	CT (Target)	CT (ACTB)	dCT	avg dCT	ddCT	SEM	fold	pvalue
	Foxj1	24.9616	17.9387	7.02294	7.64736	0	0.124418	1	0.000600576
Control (1)		24.8168	17.8971	6.91976
E18.5		24.8325	17.8878	6.94465
	Foxj1	22.9669	14.9362	8.03064
Control (2)		22.8792	14.859	8.02026
E18.5		22.9822	14.9326	8.04954
	Foxj1	22.6977	14.8793	7.81836
Control (3)		22.6893	14.8898	7.79946
E18.5		22.992	15.0232	7.96879
	Foxj1	22.4646	14.7426	7.72205
Control (4)		22.3986	14.7154	7.68321
E18.5		22.42	14.6313	7.7887
	Foxj1	23.6168	17.557	6.05989	6.77565	-0.871708	0.181025	1.82983
Jag1cnull (1)		23.6609	17.6098	6.05115
E18.5		23.5785	17.5315	6.04706
	Foxj1	23.7909	16.6734	7.11744
Jag1cnull (2)		23.7087	16.6218	7.08696
E18.5		23.6871	16.5589	7.12823
	Foxj1	21.8021	14.6748	7.12731
Jag1cnull (3)		21.8266	14.6313	7.19532
E18.5		21.797	14.6295	7.16752

## Sheet: E18.5 Jag1cnull (Scgb3a2)
sample	target	CT (Target)	CT (ACTB)	dCT	avg dCT	ddCT	SEM	fold	pvalue
	Scgb3a2	18.9449	17.1403	1.80457	1.35383	0	0.137911	1	5.319e-12
Control (1)		18.9109	17.1502	1.76071
E18.5		18.9236	17.1109	1.81265
	Scgb3a2	16.666	14.8158	1.8502
Control (2)		16.5855	14.79	1.79544
E18.5		16.6572	14.8275	1.82971
	Scgb3a2	15.6201	14.7755	0.844645
Control (3)		15.665	14.8475	0.817516
E18.5		15.6541	14.7935	0.860559
	Scgb3a2	15.6545	14.6966	0.957907
Control (4)		15.5924	14.6352	0.957287
E18.5		15.592	14.6372	0.954779
	Scgb3a2	21.3684	16.7944	4.57401	4.21208	2.85825	0.119234	0.137906
Jag1cnull (1)		21.4756	16.8485	4.62706
E18.5		21.3945	16.7996	4.59494
	Scgb3a2	20.3422	16.552	3.79024
Jag1cnull (2)		20.3437	16.5611	3.78258
E18.5		20.2572	16.4921	3.76509
	Scgb3a2	18.823	14.5534	4.26964
Jag1cnull (3)		18.9839	14.7813	4.20254
E18.5		18.8096	14.507	4.30261

## Sheet: E18.5 Jag1cnull (Scgb1a1)
sample	target	CT (Target)	CT (ACTB)	dCT	avg dCT	ddCT	SEM	fold	pvalue
	Scgb1a1	19.4703	16.9373	2.53301	1.44333	0	0.491742	1	0.000114
Control (1)		19.4949	16.9648	2.53008
E18.5		19.423	16.923	2.50003
	Scgb1a1	18.416	14.8833	3.53271
Control (2)		18.4381	14.8839	3.55429
E18.5		18.4192	14.8919	3.52726
	Scgb1a1	14.8971	14.8635	0.0335827
Control (3)		14.9649	14.9477	0.0171938
E18.5		14.915	14.8963	0.0187855
	Scgb1a1	14.5267	14.7742	-0.247581
Control (4)		14.4678	14.8327	-0.364832
E18.5		14.5346	14.8492	-0.314593
	Scgb1a1	21.454	16.9201	4.53393	4.24054	2.79721	0.100766	0.143865
Jag1cnull (1)		21.3421	16.9112	4.43088
E18.5		21.3723	16.9338	4.43851
	Scgb1a1	21.0918	16.6763	4.41559
Jag1cnull (2)		20.9594	16.5816	4.37781
E18.5		20.9274	16.4857	4.44168
	Scgb1a1	18.5192	14.633	3.88622
Jag1cnull (3)		18.4362	14.5989	3.8373
E18.5		18.4421	14.6391	3.80294

## Sheet: E18.5 Jag2cnull (Foxj1)
sample	target	CT (Target)	CT (ACTB)	dCT	avg dCT	ddCT	SEM	fold	pvalue
	Foxj1	25.5265	18.8775	6.64905	7.71939	0	0.196467	1	0.501434
Control (1)		25.5263	18.923	6.6033
E18.5		25.4528	18.8636	6.58912
	Foxj1	25.9268	17.6423	8.28449
Control (2)		25.871	17.5825	8.28843
E18.5		26.0127	17.7121	8.30058
	Foxj1	22.8843	14.9659	7.91848
Control (3)		22.9153	14.9413	7.97397
E18.5		22.7948	14.8723	7.92257
	Foxj1	25.9554	17.9228	8.03255
Control (4)		25.9091	17.9078	8.00129
E18.5		25.981	17.9121	8.06889
	Foxj1	25.6181	18.9422	6.67593	7.92021	0.200818	0.218464	0.870057
Jag2cnull (1)		25.6565	18.9538	6.70274
E18.5		25.6091	18.902	6.7071
	Foxj1	24.2658	15.8989	8.36697
Jag2cnull (2)		24.2825	15.9346	8.34785
E18.5		24.3116	15.9149	8.39669
	Foxj1	24.4926	16.4014	8.09117
Jag2cnull (3)		24.7074	16.6741	8.03333
E18.5		24.7471	16.5977	8.14937
	Foxj1	25.0267	16.5041	8.52258
Jag2cnull (4)		24.9439	16.4396	8.50428
E18.5		25.0017	16.4572	8.5445

## Sheet: E18.5 Jag2cnull (Scgb3a2)
sample	target	CT (Target)	CT (ACTB)	dCT	avg dCT	ddCT	SEM	fold	pvalue
	Scgb3a2	19.2418	18.0989	1.14287	1.40657	0	0.100193	1	0.0148675
Control (1)		19.2484	18.1569	1.09145
E18.5		19.2464	18.1195	1.12683
	Scgb3a2	19.1116	17.5364	1.57522
Control (2)		19.07	17.605	1.46494
E18.5		19.0258	17.5136	1.51226
	Scgb3a2	16.0036	14.9178	1.08579
Control (3)		16.0142	14.9311	1.08314
E18.5		16.0054	14.9083	1.09709
	Scgb3a2	19.7881	17.8867	1.90141
Control (4)		19.7088	17.7783	1.9305
E18.5		19.7846	17.9172	1.86736
	Scgb3a2	19.5545	18.1362	1.41833	1.83947	0.432898	0.129597	0.740772
Jag2cnull (1)		19.5762	18.1459	1.43034
E18.5		19.5351	18.0949	1.44013
	Scgb3a2	17.8159	15.9339	1.88201
Jag2cnull (2)		17.8317	15.9591	1.87263
E18.5		17.6729	15.8095	1.86345
	Scgb3a2	17.972	16.4646	1.50748
Jag2cnull (3)		17.9329	16.3583	1.57468
E18.5		17.9781	16.473	1.50511
	Scgb3a2	18.9547	16.406	2.5487
Jag2cnull (4)		18.9026	16.4019	2.50069
E18.5		18.8981	16.368	2.53008

## Sheet: E18.5 Jag2cnull (Scgb1a1)
sample	target	CT (Target)	CT (ACTB)	dCT	avg dCT	ddCT	SEM	fold	pvalue
	Scgb1a1	18.938	17.9614	0.976576	1.04518	0	0.154441	1	0.0190487
Control (1)		18.9372	17.9418	0.995331
E18.5		18.8597	17.9237	0.936031
	Scgb1a1	18.6448	17.7131	0.931704
Control (2)		18.6634	17.6512	1.01214
E18.5		18.5215	17.5686	0.95293
	Scgb1a1	15.4145	14.9422	0.472281
Control (3)		15.3811	14.9807	0.400427
E18.5		15.296	14.941	0.355004
	Scgb1a1	19.7171	17.8233	1.8938
Control (4)		19.8386	17.993	1.84564
E18.5		19.7318	17.9615	1.77025
	Scgb1a1	19.8104	18.025	1.78543	1.65284	0.607661	0.183873	0.65626
Jag2cnull (1)		19.6567	17.9473	1.70937
E18.5		19.7265	17.9878	1.73869
	Scgb1a1	17.43	15.8817	1.5483
Jag2cnull (2)		17.48	15.9192	1.56076
E18.5		17.4516	15.9336	1.51797
	Scgb1a1	17.2983	16.4854	0.812906
Jag2cnull (3)		17.3106	16.5262	0.784414
E18.5		17.2404	16.4185	0.82189
	Scgb1a1	18.9471	16.4123	2.53481
Jag2cnull (4)		18.9535	16.4282	2.5253
E18.5		18.948	16.4538	2.49419

## Sheet: E18.5 Jag1-Jag2cnull (Foxj)
sample	target	CT (Target)	CT (ACTB)	dCT	avg dCT	ddCT	SEM	fold	pvalue
	Foxj1	26.202	19.3938	6.80815	7.65275	0	0.172461	1	6.24314e-05
Control (1)		26.1601	19.4008	6.75923
E18.5		26.199	19.3596	6.83933
	Foxj1	22.616	14.2756	8.34036
Control (2)		22.6769	14.3043	8.37259
E18.5		22.7663	14.3431	8.42327
	Foxj1	22.9681	15.107	7.86107
Control (3)		22.9447	15.0989	7.84571
E18.5		22.9658	15.0669	7.89898
	Foxj1	23.3343	15.7971	7.53718
Control (4)		23.4485	15.8545	7.59402
E18.5		23.3386	15.7855	7.55308
	Foxj1	24.3511	18.5908	5.76036	6.54904	-1.10371	0.142754	2.14907
Jag1cnull; Jag2cnull (1)		24.3006	18.5985	5.70208
E18.5		24.3123	18.5775	5.73476
	Foxj1	23.6266	16.8763	6.7503
Jag1cnull: Jag2cnull (2)		23.6567	16.8929	6.7638
E18.5		23.6756	16.8734	6.80226
	Foxj1	22.4779	15.6679	6.80999
Jag1cnull; Jag2cnull (3)		22.4249	15.612	6.81292
E18.5		22.5565	15.7414	6.81515
	Foxj1	22.3576	15.4806	6.87702
Jag1cnull; Jag2cnull (4)		22.3412	15.491	6.85027
E18.5		22.5208	15.6113	6.90956

## Sheet: E18.5 Jag1-Jag2cnull (Scgb3a2)
sample	target	CT (Target)	CT (ACTB)	dCT	avg dCT	ddCT	SEM	fold	pvalue
	Scgb3a2	19.8512	18.7424	1.1088	1.37944	0	0.120176	1	2.54622e-21
Control (1)		19.7896	18.775	1.01457
E18.5		19.7877	18.7412	1.04653
	Scgb3a2	15.8598	14.402	1.45776
Control (2)		15.6625	14.2009	1.46158
E18.5		15.6923	14.2513	1.441
	Scgb3a2	16.0849	15.0471	1.03775
Control (3)		16.1125	15.1503	0.962179
E18.5		16.0609	15.0357	1.0252
	Scgb3a2	17.9471	15.9362	2.01088
Control (4)		17.8703	15.9172	1.95313
E18.5		18.6148	16.5809	2.03391
	Scgb3a2	27.3684	17.7756	9.59275	10.2303	8.85084	0.206448	0.00216586
Jag1cnull; Jag2cnull (1)		27.3751	17.7846	9.59044
E18.5		27.541	17.7838	9.75727
	Scgb3a2	26.5966	16.9054	9.6912
Jag1cnull: Jag2cnull (2)		26.2087	16.7819	9.42676
E18.5		26.1232	16.8149	9.30832
	Scgb3a2	26.7678	15.655	11.1128
Jag1cnull; Jag2cnull (3)		26.6394	15.755	10.8843
E18.5		26.4633	15.5529	10.9104
	Scgb3a2	26.5269	15.5173	11.0097
Jag1cnull; Jag2cnull (4)		26.2151	15.5219	10.6932
E18.5		26.2569	15.4707	10.7862

## Sheet: E18.5 Jag1-Jag2cnull (Scgb1a1)
sample	target	CT (Target)	CT (ACTB)	dCT	avg dCT	ddCT	SEM	fold	pvalue
	Scgb1a1	18.7776	18.6059	0.171761	1.20813	0	0.226404	1	6.06655e-15
Control (1)		18.686	18.6033	0.0827084
E18.5		18.6691	18.5147	0.154385
	Scgb1a1	16.2148	14.3866	1.82813
Control (2)		16.2043	14.3416	1.86275
E18.5		16.2012	14.4317	1.76949
	Scgb1a1	15.9359	15.0351	0.900827
Control (3)		16.0174	15.1676	0.849801
E18.5		15.8263	14.9355	0.890815
	Scgb1a1	17.9233	15.8862	2.03711
Control (4)		17.8871	15.8973	1.9898
E18.5		17.8381	15.8781	1.96001
	Scgb1a1	26.9097	17.4775	9.43216	8.71059	7.50246	0.333936	0.00551488
Jag1cnull; Jag2cnull (1)		26.5632	17.3859	9.17739
E18.5		26.6491	17.409	9.24011
	Scgb1a1	27.1551	16.8862	10.2689
Jag1cnull: Jag2cnull (2)		27.1417	16.9235	10.2182
E18.5		27.0275	16.869	10.1585
	Scgb1a1	23.6691	15.7067	7.96246
Jag1cnull; Jag2cnull (3)		23.5581	15.6342	7.92389
E18.5		23.5685	15.6388	7.92972
	Scgb1a1	22.9451	15.4995	7.44561
Jag1cnull; Jag2cnull (4)		22.8956	15.5308	7.36473
E18.5		22.9191	15.5137	7.40544
