# Supplementary material for: Jagged and Delta-like ligands control distinct events during airway progenitor cell differentiation
Source: eLife journal article supplement (doi:10.7554/elife.50487), 2019-10-21
Supplement: supp [file elife_poa_e50487_Figure_3_source_data_1.xlsx]

## Sheet: E18.5 Jag1cnull (Ascl1)
sample	target	CT (Target)	CT (ACTB)	dCT	avg dCT	ddCT	SEM	fold	pvalue
	Ascl1	30.3734	17.8159	12.5575	12.9843	0	0.0940007	1	0.458934
Control (1)		30.4885	17.8445	12.644
E18.5		30.2507	17.8292	12.4214
	Ascl1	27.7324	14.7703	12.9622
Control (2)		27.8	14.8486	12.9514
E18.5		27.8574	14.7529	13.1045
	Ascl1	28.2863	14.755	13.5313
Control (3)		27.8766	14.7461	13.1305
E18.5		27.9622	14.6509	13.3113
	Ascl1	27.7661	14.5894	13.1767
Control (4)		27.4353	14.6119	12.8235
E18.5		27.7444	14.5474	13.197
	Ascl1	29.6614	17.4056	12.2558	12.8382	-0.14609	0.185693	1.10657
Jag1cnull (1)		29.503	17.4119	12.0911
E18.5		29.5507	17.4101	12.1406
	Ascl1	29.4007	16.4994	12.9012
Jag1cnull (2)		29.4174	16.4995	12.9179
E18.5		29.4446	16.4814	12.9632
	Ascl1	27.8407	14.4748	13.3659
Jag1cnull (3)		27.8692	14.5496	13.3196
E18.5		28.1172	14.529	13.5882

## Sheet: E18.5 Jag2cnull (Ascl1)
sample	target	CT (Target)	CT (ACTB)	dCT	avg dCT	ddCT	SEM	fold	pvalue
	Ascl1	30.3759	18.7442	11.6317	12.6181	0	0.171994	1	0.947797
Control (1)		30.4883	18.7912	11.6971
E18.5		30.4059	18.7532	11.6527
	Ascl1	30.7144	17.628	13.0864
Control (2)		30.5775	17.5213	13.0562
E18.5		30.735	17.564	13.1711
	Ascl1	27.4271	14.728	12.6991
Control (3)		27.672	14.923	12.749
E18.5		27.4245	14.6974	12.7271
	Ascl1	30.7573	17.7878	12.9695
Control (4)		30.751	17.7426	13.0084
E18.5		30.7047	17.7357	12.969
	Ascl1	30.7174	18.8664	11.851	12.6024	-0.0157143	0.163471	1.01095
Jag2cnull (1)		30.6327	18.8381	11.7946
E18.5		30.7397	18.8546	11.8852
	Ascl1	28.4636	15.8759	12.5876
Jag2cnull (2)		28.2864	15.8157	12.4707
E18.5		28.3963	15.7492	12.6471
	Ascl1	28.9357	16.3048	12.631
Jag2cnull (3)		28.9585	16.3185	12.64
E18.5		28.9657	16.3509	12.6148
	Ascl1	29.7677	16.3347	13.433
Jag2cnull (4)		29.6696	16.2817	13.3879
E18.5		29.6592	16.3734	13.2858

## Sheet: E18.5 Jag1-Jag2cnull (Ascl1)
sample	target	CT (Target)	CT (ACTB)	dCT	avg dCT	ddCT	SEM	fold	pvalue
	Ascl1	31.1183	19.4071	11.7112	12.2116	0	0.130839	1	0.447793
Control (1)		30.9501	19.3874	11.5627
E18.5		30.9593	19.3939	11.5654
	Ascl1	26.8963	14.2212	12.6751
Control (2)		26.8981	14.2463	12.6518
E18.5		26.9337	14.2364	12.6973
	Ascl1	27.6836	15.051	12.6326
Control (3)		27.425	14.9797	12.4453
E18.5		27.6987	15.0926	12.6061
	Ascl1	27.6659	15.6641	12.0018
Control (4)		27.7181	15.7095	12.0086
E18.5		27.6656	15.6849	11.9807
	Ascl1	30.2077	18.4955	11.7121	12.0873	-0.12429	0.0934853	1.08997
Jag1cnull; Jag2cnull (1)		30.1578	18.5002	11.6577
E18.5		30.0272	18.5248	11.5024
	Ascl1	28.7663	16.7901	11.9762
Jag1cnull: Jag2cnull (2)		28.8455	16.8563	11.9893
E18.5		28.9676	16.8386	12.1291
	Ascl1	28.155	15.7004	12.4546
Jag1cnull; Jag2cnull (3)		28.0569	15.601	12.456
E18.5		27.9375	15.5554	12.3821
	Ascl1	27.6857	15.3325	12.3532
Jag1cnull; Jag2cnull (4)		27.5898	15.3836	12.2062
E18.5		27.6942	15.4659	12.2283

## Sheet: E18.5 Jag1-Jag2cnull (Upk3a)
sample	target	CT (Target)	CT (ACTB)	dCT	avg dCT	ddCT	SEM	fold	pvalue
	Upk3a	27.9539	19.4721	8.48175	8.74987	0	0.0781044	1	6.78772e-23
Control (1)		27.8942	19.4985	8.39573
E18.5		27.8966	19.4603	8.43633
	Upk3a	23.904	14.9525	8.95149
Control (2)		23.9619	15.0485	8.91342
E18.5		23.9732	15.0325	8.94077
	Upk3a	24.4729	15.9135	8.55943
Control (3)		24.3418	15.7955	8.54633
E18.5		24.428	15.8491	8.57881
	Upk3a	25.5621	16.4801	9.08194
Control (4)		25.5608	16.5255	9.03526
E18.5		25.4608	16.3837	9.07715
	Upk3a	31.8601	18.5921	13.268	13.2425	4.49265	0.0665539	0.0444199
Jag1cnull; Jag2cnull (1)		31.8309	18.541	13.2899
E18.5		31.8311	18.5954	13.2357
	Upk3a	30.4316	17.5522	12.8794
Jag1cnull: Jag2cnull (2)		30.5199	17.5932	12.9267
E18.5		30.3798	17.5267	12.8531
	Upk3a	29.8728	16.3714	13.5014
Jag1cnull; Jag2cnull (3)		29.6559	16.3805	13.2755
E18.5		29.6299	16.2316	13.3982
	Upk3a	29.6233	16.1482	13.4751
Jag1cnull; Jag2cnull (4)		29.507	16.1098	13.3972
E18.5		29.5472	16.1371	13.4101
