# Supplementary material for: Jagged and Delta-like ligands control distinct events during airway progenitor cell differentiation
Source: eLife journal article supplement (doi:10.7554/elife.50487), 2019-10-21
Supplement: supp [file elife_poa_e50487_Figure_4_source_data_1.xlsx]

## Sheet: E18.5 Dll1cnull (Ascl1)
sample	target	CT (Target)	CT (ACTB)	dCT	avg dCT	ddCT	SEM	fold	pvalue
	Ascl1	27.456	15.3056	12.1505	12.2772	0	0.0571895	1	3.95609e-06
Control (1)		27.5781	15.3318	12.2463
E18.5		27.4137	15.2839	12.1298
	Ascl1	27.5866	15.44	12.1466
Control (2)		27.6285	15.4673	12.1612
E18.5		27.586	15.4181	12.1679
	Ascl1	27.9756	15.4015	12.5741
Control (3)		27.8453	15.3807	12.4646
E18.5		27.7613	15.3079	12.4534
	Ascl1	27.673	16.0929	11.5801	11.7319	-0.545249	0.0600242	1.45927
Dll1cnull		27.8229	16.1879	11.635
E18.5		27.7473	16.1892	11.5581
	Ascl1	27.8408	15.9772	11.8636
Dll1cnull		27.8117	15.9539	11.8578
E18.5		27.7844	15.9736	11.8108
	Ascl1	27.5621	15.9779	11.5842
Dll1cnull		27.6113	16.0085	11.6029
E18.5		27.5681	15.9972	11.5709
	Ascl1	27.5687	15.4243	12.1444
Dll1cnull		27.4955	15.4083	12.0872
E18.5		27.5044	15.3782	12.1262
	Ascl1	26.9704	15.4164	11.554
Dll1cnull		26.8801	15.3959	11.4841
E18.5		26.9476	15.4285	11.5192

## Sheet: E18.5 Dll1cnull (Cgrp)
sample	target	CT (Target)	CT (ACTB)	dCT	avg dCT	ddCT	SEM	fold	pvalue
	Cgrp	25.8834	15.1224	10.761	10.5212	0	0.0858904	1	0.237485
Control (1)		25.946	15.2331	10.7129
E18.5		25.9751	15.2184	10.7568
	Cgrp	25.8765	15.2973	10.5793
Control (2)		25.9708	15.3384	10.6324
E18.5		25.9725	15.3428	10.6297
	Cgrp	25.9453	15.249	10.6963
Control (3)		25.959	15.2671	10.6919
E18.5		25.9279	15.2397	10.6881
	Cgrp	25.4057	15.3539	10.0518
Control (4)		25.4791	15.4327	10.0464
E18.5		25.4375	15.4292	10.0083
	Cgrp	26.4365	16.0064	10.4301	10.3504	-0.170789	0.105673	1.12567
Dll1cnull		26.3804	16.0077	10.3727
E18.5		26.5946	16.0599	10.5347
	Cgrp	26.5373	15.991	10.5463
Dll1cnull		26.3121	15.9474	10.3647
E18.5		26.3625	15.9448	10.4177
	Cgrp	25.8614	15.9254	9.93599
Dll1cnull		25.587	15.8162	9.77073
E18.5		25.673	15.8813	9.79171
	Cgrp	26.2861	15.2717	11.0144
Dll1cnull		26.2207	15.2817	10.939
E18.5		26.2482	15.2738	10.9745
	Cgrp	25.4897	15.3961	10.0936
Dll1cnull		25.3596	15.3202	10.0395
E18.5		25.3912	15.3599	10.0313

## Sheet: E18.5 Dll4cnull (Ascl1)
sample	target	CT (Target)	CT (ACTB)	dCT	avg dCT	ddCT	SEM	fold	pvalue
	Ascl1	27.963	15.5146	12.4484	11.3529	0	0.406923	1	0.365475
Control (1)		27.9722	15.4565	12.5157
E18.5		28.1912	15.6282	12.563
	Ascl1	27.6283	17.8361	9.79224
Control (2)		27.7453	18.0057	9.73954
E18.5		27.6809	17.8598	9.82105
	Ascl1	28.8753	17.1289	11.7464
Control (3)		28.839	17.1338	11.7053
E18.5		28.846	17.0016	11.8444
	Ascl1	28.2097	18.0505	10.1591	10.9823	-0.370602	0.200706	1.29289
Dll4cnull		28.251	18.1039	10.147
E18.5		28.2252	18.0693	10.1559
	Ascl1	28.9183	18.6074	10.311
Dll4cnull		28.9619	18.6751	10.2869
E18.5		28.9733	18.6415	10.3319
	Ascl1	29.3074	19.0821	10.2253
Dll4cnull		29.1746	19.0788	10.0958
E18.5		29.2239	19.0616	10.1624
	Ascl1	28.4088	16.6286	11.7802
Dll4cnull		28.5469	16.685	11.862
E18.5		28.4973	16.6092	11.8881
	Ascl1	27.8792	15.7049	12.1743
Dll4cnull		27.7182	15.574	12.1442
E18.5		27.9469	15.6608	12.2861
	Ascl1	27.365	16.1886	11.1764
Dll4cnull		27.3838	16.1341	11.2497
E18.5		27.2966	16.0517	11.2449

## Sheet: E18.5 Dll4cnull (Cgrp)
sample	target	CT (Target)	CT (ACTB)	dCT	avg dCT	ddCT	SEM	fold	pvalue
	Cgrp	26.987	15.4854	11.5015	10.6132	0	0.377949	1	0.443693
Control (1)		26.5943	15.4191	11.1752
E18.5		26.7198	15.415	11.3048
	Cgrp	26.982	17.7822	9.19975
Control (2)		26.8875	17.8517	9.03582
E18.5		26.9432	17.8446	9.09863
	Cgrp	28.6646	17.0665	11.5981
Control (3)		28.2981	17.0243	11.2738
E18.5		28.3563	17.0252	11.3311
	Cgrp	27.628	17.8386	9.78932	10.3262	-0.286949	0.181716	1.22006
Dll4cnull		27.3903	17.7669	9.62337
E18.5		27.2685	17.7401	9.52847
	Cgrp	28.9748	18.977	9.99773
Dll4cnull		28.5798	18.9456	9.63421
E18.5		28.6938	18.9627	9.73118
	Cgrp	28.5629	19.1064	9.45655
Dll4cnull		28.5087	19.1316	9.37718
E18.5		28.4561	19.0906	9.36554
	Cgrp	27.411	16.5645	10.8465
Dll4cnull		27.2062	16.5109	10.6954
E18.5		27.0951	16.4551	10.64
	Cgrp	26.9656	15.5983	11.3673
Dll4cnull		26.9085	15.6427	11.2658
E18.5		26.8439	15.5594	11.2845
	Cgrp	27.3379	16.1942	11.1437
Dll4cnull		27.2052	16.0393	11.1659
E18.5		27.105	16.1454	10.9596

## Sheet: E18.5 Dll1Dll4cnull (Ascl1)
sample	target	CT (Target)	CT (ACTB)	dCT	avg dCT	ddCT	SEM	fold	pvalue
	Ascl1	27.9832	16.7008	11.2823	11.9228	0	0.16045	1	1.06605e-06
Control (1)		27.9804	16.7703	11.2101
E18.5		28.0859	16.7275	11.3584
	Ascl1	30.7851	18.5489	12.2362
Control (2)		30.9546	18.7202	12.2344
E18.5		30.9847	18.7341	12.2506
	Ascl1	28.9627	16.7269	12.2359
Control (3)		28.8852	16.6781	12.2071
E18.5		28.9739	16.6834	12.2906
	Ascl1	28.374	19.6293	8.74472	9.3804	-2.54244	0.29338	5.82572
Dll1cnull; Dll4cnull		28.5243	19.7396	8.78468
E18.5		28.5344	19.7345	8.79983
	Ascl1	28.4442	19.7253	8.71882
Dll1cnull; Dll4cnull		28.6626	19.8038	8.85883
E18.5		28.6493	19.784	8.86536
	Ascl1	31.0341	20.499	10.5351
Dll1cnull; Dll4cnull		31.0596	20.5984	10.4612
E18.5		31.1333	20.4782	10.655

## Sheet: E18.5 Dll1Dll4cnull (Cgrp)
sample	target	CT (Target)	CT (ACTB)	dCT	avg dCT	ddCT	SEM	fold	pvalue
	Cgrp	27.0005	16.6341	10.3664	10.9349	0	0.161309	1	5.86381e-05
Control (1)		26.981	16.6891	10.2919
E18.5		26.9749	16.6854	10.2895
	Cgrp	30.2851	18.8579	11.4272
Control (2)		29.7989	18.7936	11.0052
E18.5		29.9054	18.8003	11.105
	Cgrp	28.1643	16.7338	11.4305
Control (3)		27.9643	16.693	11.2712
E18.5		27.9721	16.7451	11.227
	Cgrp	28.8452	19.718	9.12716	9.50715	-1.42776	0.209318	2.69028
Dll1cnull; Dll4cnull		28.94	19.7312	9.20877
E18.5		28.9611	19.8005	9.1606
	Cgrp	28.6776	19.5761	9.10156
Dll1cnull; Dll4cnull		28.5882	19.6624	8.92577
E18.5		28.7039	19.6622	9.04171
	Cgrp	30.9592	20.4755	10.4837
Dll1cnull; Dll4cnull		30.8588	20.5682	10.2906
E18.5		30.9104	20.6859	10.2245
