# Supplementary material for: Jagged and Delta-like ligands control distinct events during airway progenitor cell differentiation
Source: eLife journal article supplement (doi:10.7554/elife.50487), 2019-10-21
Supplement: supp [file elife_poa_e50487_Figure_6_source_data_1.xlsx]

## Sheet: E18.5 Dll1Dll4cnull (Upk3a)
sample	target	CT (Target)	CT (ACTB)	dCT	avg dCT	ddCT	SEM	fold	pvalue
	Upk3a	25.7316	16.7449	8.98665	9.36801	0	0.115651	1	0.0320008
Control (1)		25.6565	16.7752	8.88131
E18.5		25.5953	16.7013	8.89399
	Upk3a	28.4818	18.7962	9.68562
Control (2)		28.3678	18.8907	9.47708
E18.5		28.461	18.7224	9.73857
	Upk3a	26.2439	16.748	9.49592
Control (3)		26.2539	16.7138	9.54012
E18.5		26.4453	16.8324	9.61282
	Upk3a	27.9898	19.7175	8.27225	8.81349	-0.554515	0.205797	1.46867
Dll1cnull; Dll4cnull		27.7658	19.6935	8.07226
E18.5		27.9092	19.7403	8.16888
	Upk3a	28.3946	19.6939	8.70068
Dll1cnull; Dll4cnull		28.3748	19.6942	8.68055
E18.5		28.33	19.6233	8.70669
	Upk3a	29.971	20.4716	9.49941
Dll1cnull; Dll4cnull		30.1809	20.6382	9.54268
E18.5		30.3678	20.6897	9.67806

## Sheet: E18.5 Dll1Dll4cnull (Scgb1a1)
sample	target	CT (Target)	CT (ACTB)	dCT	avg dCT	ddCT	SEM	fold	pvalue
	Scgb1a1	16.3282	16.6477	-0.319527	0.854875	0	0.297248	1	0.457159
Control (1)		16.6966	16.9504	-0.253733
E18.5		16.6173	16.88	-0.262753
	Scgb1a1	19.9394	18.8391	1.10032
Control (2)		19.8486	18.7234	1.12521
E18.5		19.9694	18.8569	1.11249
	Scgb1a1	18.4913	16.7114	1.77992
Control (3)		18.5689	16.8527	1.71623
E18.5		18.5402	16.8445	1.69571
	Scgb1a1	19.9372	19.9085	0.0287476	0.546994	-0.307881	0.273686	1.23789
Dll1cnull; Dll4cnull		19.8755	19.841	0.0345173
E18.5		19.961	19.8126	0.148365
	Scgb1a1	19.6559	19.7554	-0.0994492
Dll1cnull; Dll4cnull		19.7719	19.8212	-0.0492935
E18.5		19.7124	19.7636	-0.0512123
	Scgb1a1	22.323	20.6389	1.68417
Dll1cnull; Dll4cnull		22.3439	20.6889	1.65492
E18.5		22.3636	20.7914	1.57218

## Sheet: E18.5 Dll1Dll4cnull (Foxj1)
sample	target	CT (Target)	CT (ACTB)	dCT	avg dCT	ddCT	SEM	fold	pvalue
	Foxj1	23.9615	16.7173	7.24414	7.04954	0	0.0667613	1	0.0671381
Control (1)		24.1002	16.7843	7.31589
E18.5		24.1448	16.7861	7.35873
	Foxj1	25.7856	18.8116	6.97404
Control (2)		25.6737	18.7633	6.91032
E18.5		25.6082	18.7326	6.87561
	Foxj1	23.7419	16.7304	7.01148
Control (3)		23.555	16.6966	6.85839
E18.5		23.5869	16.6896	6.89729
	Foxj1	26.006	19.7261	6.27991	6.72174	-0.327797	0.152962	1.2551
Dll1cnull; Dll4cnull		25.981	19.7634	6.21761
E18.5		26.0802	19.7597	6.32044
	Foxj1	26.4532	19.8787	6.57457
Dll1cnull; Dll4cnull		26.9803	20.3382	6.64217
E18.5		25.8878	19.3035	6.58436
	Foxj1	27.9773	20.5035	7.47379
Dll1cnull; Dll4cnull		27.8337	20.6602	7.17346
E18.5		28.0183	20.7889	7.22941
